CORRECTION

# Correction: Immune Response to Dengue Virus Infection in Pediatric Patients in New Delhi, India—Association of Viremia, Inflammatory Mediators and Monocytes with Disease Severity

Mohit Singla, Meenakshi Kar, Tavpritesh Sethi, Sushil K. Kabra, Rakesh Lodha, Anmol Chande, Guruprasad R. Medigeshi

There is an error in part A of [Fig 2](#). The line graph in part ii of part A is shifted slightly to the left. Please see the corrected version [here](#).

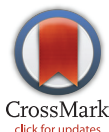

## OPEN ACCESS

**Citation:** Singla M, Kar M, Sethi T, Kabra SK, Lodha R, Chande A, et al. (2016) Correction: Immune Response to Dengue Virus Infection in Pediatric Patients in New Delhi, India—Association of Viremia, Inflammatory Mediators and Monocytes with Disease Severity. PLoS Negl Trop Dis 10(4): e0004642. doi:10.1371/journal.pntd.0004642

**Published:** April 14, 2016

**Copyright:** © 2016 Singla et al. This is an open access article distributed under the terms of the [Creative Commons Attribution License](#), which permits unrestricted use, distribution, and reproduction in any medium, provided the original author and source are credited.

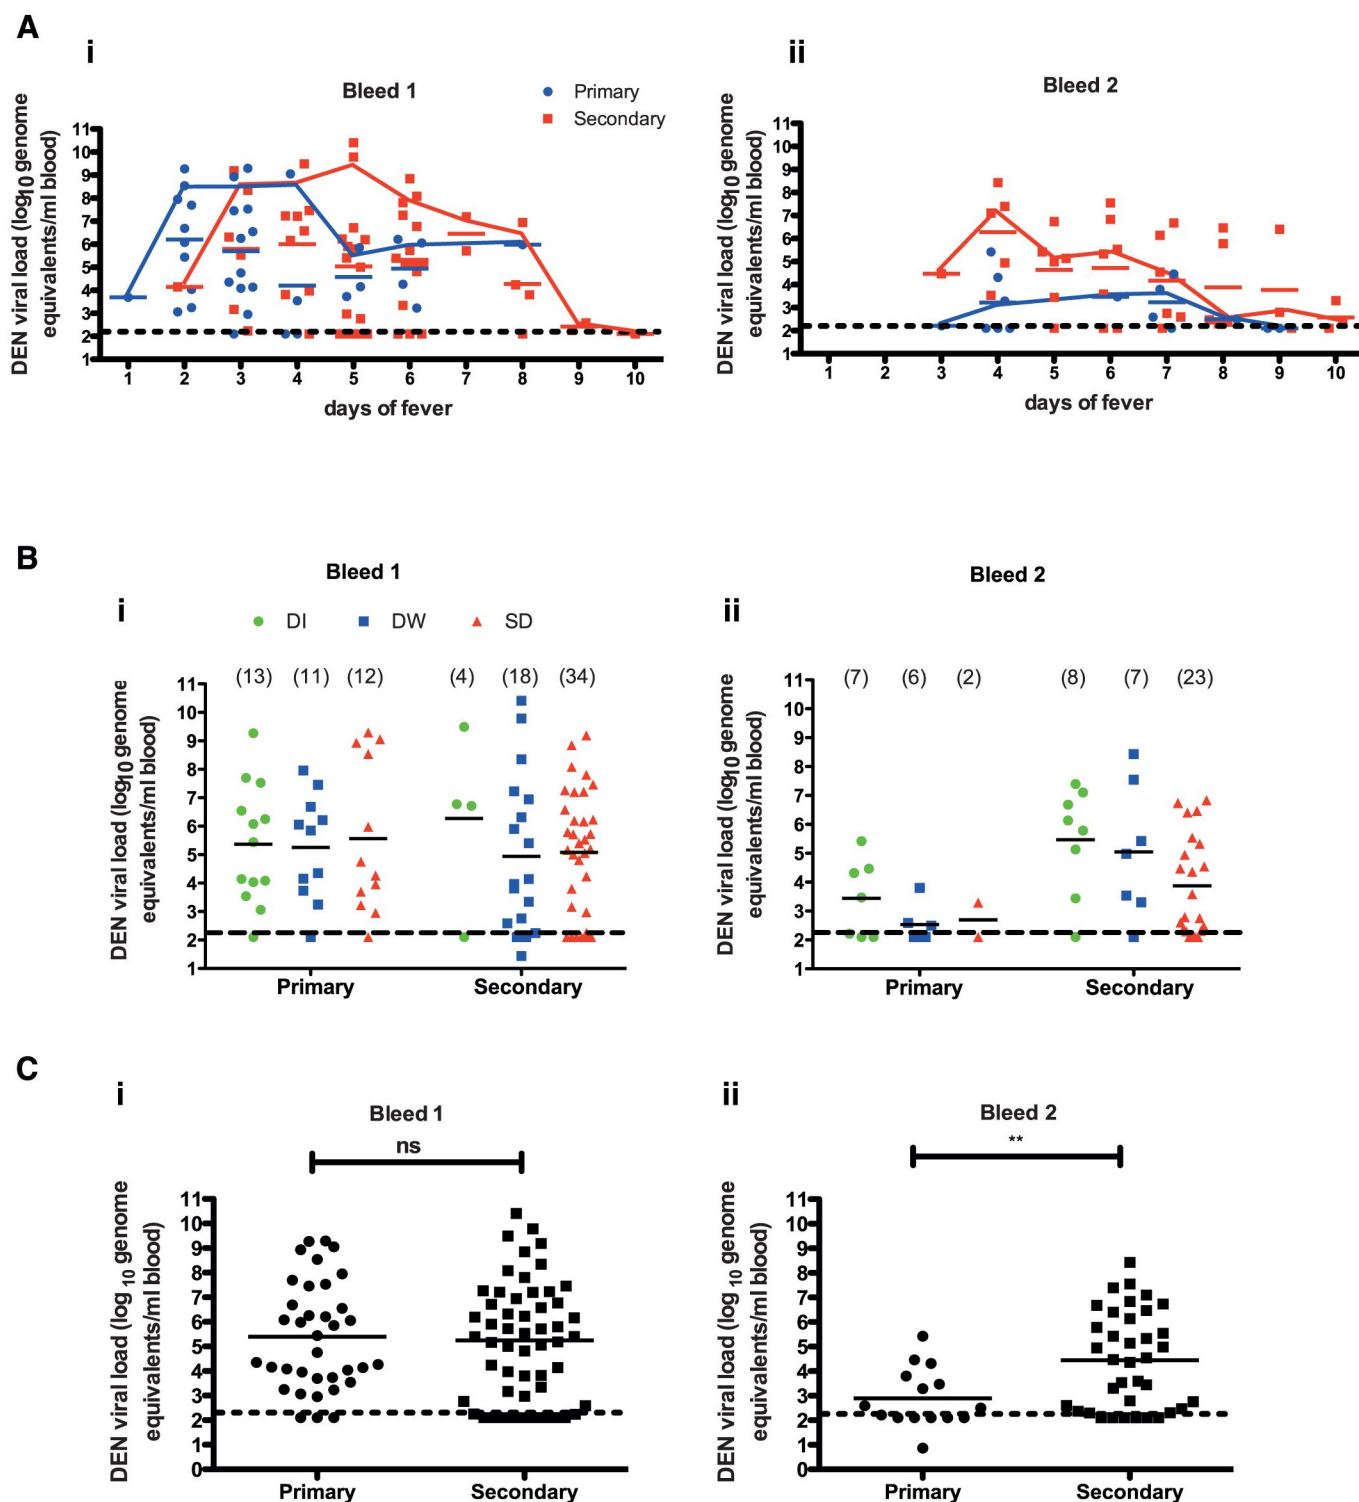

**Fig 2. Dengue viremia does not correlate with disease severity.** (A) Dengue viral RNA levels in patients classified as primary and secondary dengue infections in bleed 1 (i) and bleed 2 (ii) with respect to the day of fever. An overlapping connecting line graph shows median values of the respective scatter plot. (B) Relationship between dengue plasma viremia and disease severity at the time of admission (i) and 48 h post admission (bleed 2) (ii) in patients with primary and secondary dengue infection. (C) Overall comparison of dengue viremia in all primary and secondary infections in bleed 1 (i) and bleed 2 (ii). Geometric mean value of the scatter plot is shown in all figures. Statistical significance was determined by Mann-Whitney test. \*\*  $P = 0.0074$ .

doi:10.1371/journal.pntd.0004642.g001

## Reference

1. Singla M, Kar M, Sethi T, Kabra SK, Lodha R, Chandele A, et al. (2016) Immune Response to Dengue Virus Infection in Pediatric Patients in New Delhi, India—Association of Viremia, Inflammatory Mediators and Monocytes with Disease Severity. PLoS Negl Trop Dis 10(3): e0004497. doi: [10.1371/journal.pntd.0004497](https://doi.org/10.1371/journal.pntd.0004497) PMID: [26982706](https://pubmed.ncbi.nlm.nih.gov/26982706/)
